# Supplementary material for: A facile dip-coating method for the preparation of separable MoS2 sponges and their high-efficient adsorption behaviors of Rhodamine B
Source: Royal Society of Chemistry journal article supplement (doi:10.1039/c8qi00012c), 2018-01-01
Supplement: c8qi00012c1.pdf [file c8qi00012c1.pdf]

# **A facile dip-coating method for the preparation of separable MoS<sub>2</sub> sponges and their high-efficient adsorption behaviors of Rhodamine B**

## **Supporting Information**

Yueyun Fang<sup>a, c</sup>, Qizhang Huang<sup>a, c</sup>, Pengyi Liu<sup>b</sup>, Jifu Shi<sup>b, \*,</sup>, Gang Xu<sup>a, d, \*</sup>

<sup>a</sup> Guangzhou Institute of Energy Conversion, Key Laboratory of Renewable Energy, Guangdong Provincial Key Laboratory of New and Renewable Energy Research and Development, Chinese Academy of Sciences, Guangzhou, Guangdong 510640, China

<sup>b</sup> Siyuan Laboratory, Guangzhou Key Laboratory of Vacuum Coating Technologies and New Energy Materials, Guangdong Provincial Engineering Technology Research Center of Vacuum Coating Technologies and New Energy Materials, Department of Physics, Jinan University, Guangzhou, Guangdong 510632, China

<sup>c</sup> University of Chinese Academy of Sciences, Beijing 100049, China

<sup>d</sup> Tibet New Energy Research and Demonstration Centre, Lhasa, Tibet 85000, China

\* Corresponding authors, E-mail address: [shijf@ms.giec.ac.cn](mailto:shijf@ms.giec.ac.cn) (Jifu Shi);

[xugang@ms.giec.ac.cn](mailto:xugang@ms.giec.ac.cn) (Gang Xu)

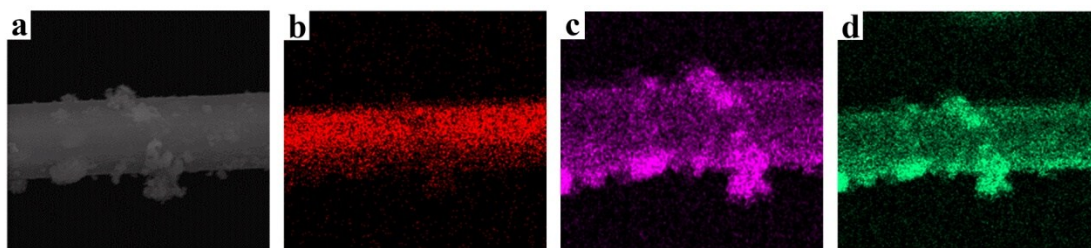

**Figure S1.** EDS mapping of the distribution of the (b) N element, (c) Mo element and (d) S element on the surface of MoS<sub>2</sub> sponge (a).

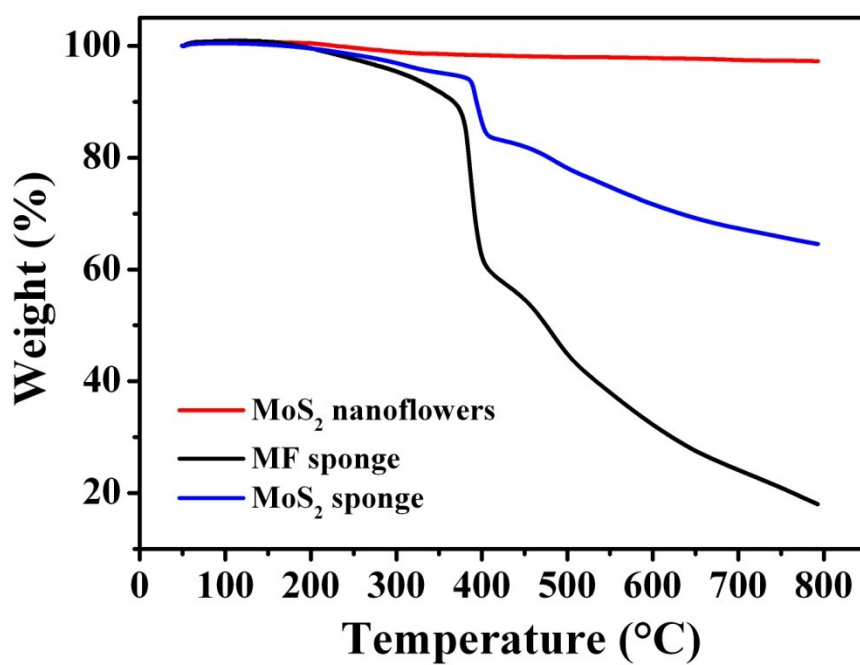

**Figure S2.** TG curves of MoS<sub>2</sub> nanoflowers, MF sponge and MoS<sub>2</sub> sponge.

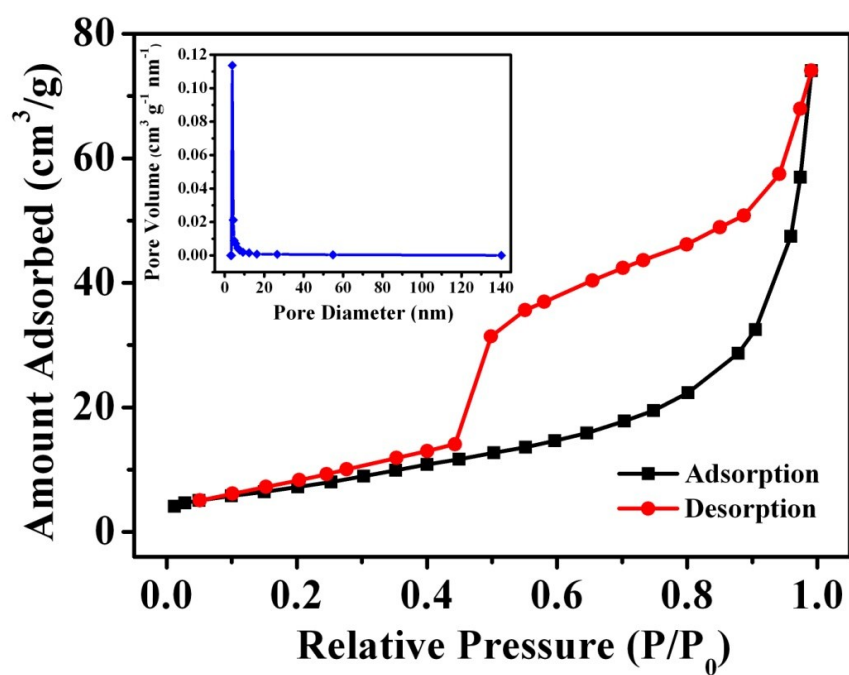

**Figure S3.** Nitrogen adsorption-desorption isotherms and pore size distribution (inset) of MoS<sub>2</sub> nanoflowers.

**Table S1.** The experimental zeta potential data of MoS<sub>2</sub> nanoflowers.

| Experimental zeta potential/mV | Average zeta potential/mV |
|--------------------------------|---------------------------|
| -20.51                         | -21.0                     |
| -21.62                         |                           |
| -21.21                         |                           |
| -20.10                         |                           |
| -21.56                         |                           |

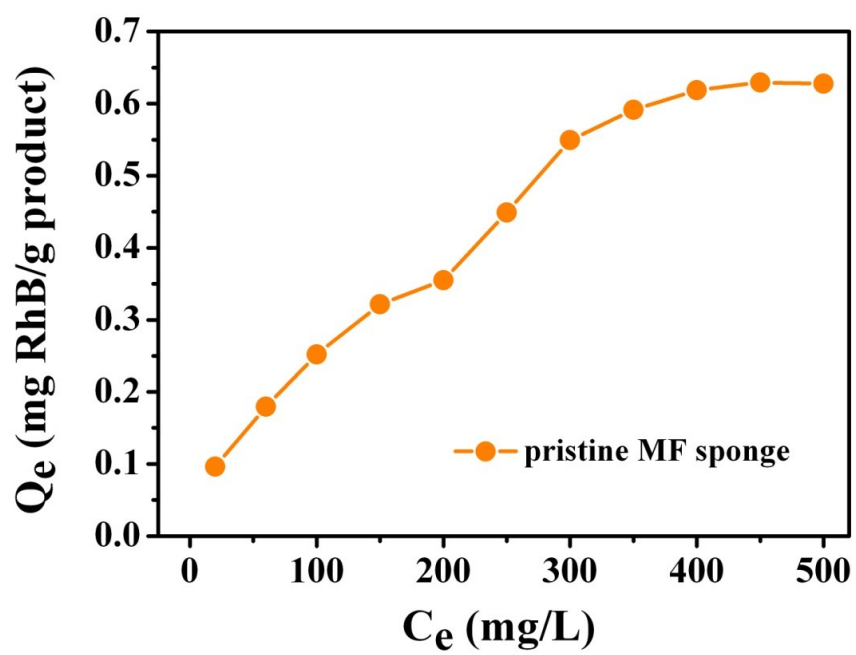

**Figure S4.** Adsorption isotherms of RhB onto the pristine MF sponges.
